# Supplementary material for: Population Genomics of Bettongia lesueur: Admixing Increases Genetic Diversity with no Evidence of Outbreeding Depression
Source: MDPI journal article supplement (doi:10.3390/genes10110851), 2019-10-28
Supplement: s1 [file s1]

**Table S3.** Average error rates of replicated samples for iterating STACKS parameters of m (minimum number of raw reads required to form a stack) and M (distance allowed between two stacks). Standard errors are in parentheses.

| Parameter                                                       | Locus error   | Allele error  | SNP error     |
|-----------------------------------------------------------------|---------------|---------------|---------------|
| <b>Minimum number of raw reads required to form a stack (m)</b> |               |               |               |
| m3                                                              | 0.052 (0.040) | 0.019 (0.011) | 0.019 (0.003) |
| m4                                                              | 0.042 (0.035) | 0.013 (0.009) | 0.013 (0.003) |
| m5                                                              | 0.036 (0.031) | 0.009(0.008)  | 0.009 (0.002) |
| m6                                                              | 0.034 (0.030) | 0.008 (0.007) | 0.008 (0.002) |
| m7                                                              | 0.033 (0.030) | 0.007 (0.007) | 0.007 (0.002) |
| <b>Distance allowed between two stacks (M)</b>                  |               |               |               |
| M1                                                              | 0.053 (0.039) | 0.021 (0.011) | 0.021 (0.003) |
| M2                                                              | 0.052 (0.040) | 0.019 (0.010) | 0.019 (0.003) |
| M3                                                              | 0.052 (0.040) | 0.018 (0.010) | 0.018 (0.003) |
| M4                                                              | 0.052 (0.040) | 0.018 (0.010) | 0.018 (0.003) |
| M5                                                              | 0.053 (0.040) | 0.018 (0.010) | 0.018 (0.003) |
| M6                                                              | 0.053 (0.040) | 0.019 (0.010) | 0.019 (0.003) |
| M7                                                              | 0.053 (0.040) | 0.019 (0.011) | 0.019 (0.003) |
| M8                                                              | 0.053 (0.040) | 0.019 (0.011) | 0.019 (0.003) |
