# Supplementary material for: Population Genomics of Bettongia lesueur: Admixing Increases Genetic Diversity with no Evidence of Outbreeding Depression
Source: MDPI journal article supplement (doi:10.3390/genes10110851), 2019-10-28
Supplement: s1 [file s1]

**Table S2.** AIC values for reduced Cormack-Jolly-Seber (CJS) and Jolly-Seber-Schwarz-Arnason (JSSA) models tested using the R package openCR for apparent survival and per capita recruitment rate estimates of *Bettongia lesueur* at Matuwa.

| Model type | Likelihood             | Model parametrizations                                     | logLik   | AIC      | AICc     | dAIC     |
|------------|------------------------|------------------------------------------------------------|----------|----------|----------|----------|
| CJS        |                        | $p \sim 1 \phi \sim 1$                                     | -9074.23 | 18152.46 | 18152.48 | 0        |
| JSSA       | Conditional likelihood | $p \sim 1 \phi \sim 1 b \sim 1$                            | -15053.3 | 30112.58 | 30112.62 | 11960.12 |
| JSSA       | Conditional likelihood | $p \sim 1 \phi \sim 1 f \sim 1$                            | -14939.6 | 29885.22 | 29885.26 | 11732.76 |
| JSSA       | Conditional likelihood | $p \sim 1 \phi \sim 1 \gamma \sim 1$                       | -14939.6 | 29885.22 | 29885.26 | 11732.76 |
| JSSA       | Conditional likelihood | $p \sim 1 \phi \sim 1 \lambda \sim 1$                      | -14939.6 | 29885.22 | 29885.26 | 11732.76 |
| JSSA       | Full likelihood        | $p \sim 1 \phi \sim 1 b \sim 1 \text{super}N \sim 1$       | -15057.6 | 30123.28 | 30123.34 | 11970.81 |
| JSSA       | Full likelihood        | $p \sim 1 \phi \sim 1 f \sim 1 \text{super}N \sim 1$       | -14944   | 29895.91 | 29895.97 | 11743.45 |
| JSSA       | Full likelihood        | $p \sim 1 \phi \sim 1 \gamma \sim 1 \text{super}N \sim 1$  | -14944   | 29895.91 | 29895.97 | 11743.45 |
| JSSA       | Full likelihood        | $p \sim 1 \phi \sim 1 \lambda \sim 1 \text{super}N \sim 1$ | -14944   | 29895.92 | 29895.98 | 11743.45 |
| JSSA       | Full likelihood        | $p \sim 1 \phi \sim 1 BN \sim 1$                           | -15083.6 | 30173.16 | 30173.2  | 12020.7  |
| JSSA       | Full likelihood        | $p \sim 1 \phi \sim 1 N \sim 1$                            | -14993   | 29991.92 | 29991.96 | 11839.46 |
