# Supplementary material for: Population Genomics of Bettongia lesueur: Admixing Increases Genetic Diversity with no Evidence of Outbreeding Depression
Source: MDPI journal article supplement (doi:10.3390/genes10110851), 2019-10-28
Supplement: s1 [file s1]

**Table S7.** Apparent survival and recruitment rate estimates  $\pm$  standard error for founding individuals of *Bettongia lesueur* from each founder population and each hybrid class of the translocated population: pure-bred Barrow Island (BWI), pure-bred Dryandra (DRY), backcross to Barrow Island ( $F_1 \times BWI$ ),  $F_1$  hybrid ( $F_1$ ),  $F_2$  hybrid ( $F_2$ ), backcrossed to Dryandra ( $F_1 \times DRY$ ) and pure-bred Dryandra (DRY). 95% confidence intervals are in parentheses.

|                     | Apparent survival          |                            | Recruitment rate             |
|---------------------|----------------------------|----------------------------|------------------------------|
|                     | Female                     | Male                       |                              |
| Founder populations |                            |                            |                              |
| BWI                 | 0.937±0.022 (0.855, 0.960) | 0.928±0.025 (0.836, 0.954) | 0.201±0.046 (0.157, 0.380)   |
| DRY                 | 0.916±0.029 (0.814, 0.945) | 0.904±0.032 (0.790, 0.937) | 0.050±0.012 (0.039, 0.096)   |
| Matuwa population   |                            |                            |                              |
| BWI                 | 0.944±0.021 (0.867, 0.965) | 0.935±0.023 (0.849, 0.959) | 0.133±0.033 (0.099, 0.260)   |
| F1×BWI              | 0.960±0.016 (0.898, 0.976) | 0.953±0.019 (0.883, 0.972) | 0.200±0.049 (0.152, 0.388)   |
| F1                  | 0.983±0.008 (0.951, 0.991) | 0.980±0.009 (0.944, 0.989) | 0.134±0.036 (0.098, 0.270)   |
| F2                  | 0.966±0.015 (0.909, 0.982) | 0.961±0.017 (0.893, 0.979) | 0.221±0.056 (0.165, 0.435)   |
| F1×DRY              | 0.967±0.016 (0.907, 0.983) | 0.961±0.018 (0.893, 0.980) | 0.001±0.00003 (0.000, 0.002) |
| DRY                 | 0.928±0.030 (0.822, 0.959) | 0.918±0.034 (0.799, 0.953) | 0.113±0.037 (0.074, 0.249)   |
