# Supplementary material for: Population Genomics of Bettongia lesueur: Admixing Increases Genetic Diversity with no Evidence of Outbreeding Depression
Source: MDPI journal article supplement (doi:10.3390/genes10110851), 2019-10-28
Supplement: s1 [file s1]

**Table S4.** Multi-locus heterozygosity (MLH) of *Bettongia lesueur* for females and males in either founder population, Barrow Island (BWI) and Dryandra (DRY), and the translocated Matuwa population. Standard errors are stated in parentheses.

|               | <b>Female</b> | <b>Male</b>   |
|---------------|---------------|---------------|
| <b>BWI</b>    | 0.192 (0.004) | 0.202 (0.008) |
| <b>DRY</b>    | 0.175 (0.004) | 0.181 (0.004) |
| <b>Matuwa</b> | 0.295 (0.010) | 0.326 (0.011) |
