# Supplementary material for: Population Genomics of Bettongia lesueur: Admixing Increases Genetic Diversity with no Evidence of Outbreeding Depression
Source: MDPI journal article supplement (doi:10.3390/genes10110851), 2019-10-28
Supplement: s1 [file s1]

**Figure S9.** Friedman's ANOVA  $p$ -values for estimates of per capita recruitment rate of *Bettongia lesueur* from founder populations; Barrow Island and Dryandra and each hybrid class of the translocated population; pure-bred Barrow Island (BWI), pure-bred Dryandra (DRY), backcross to Barrow Island ( $F_1 \times BWI$ ),  $F_1$  hybrid ( $F_1$ ),  $F_2$  hybrid ( $F_2$ ), backcross to Dryandra ( $F_1 \times DRY$ ) and pure-bred Dryandra (DRY). Significant  $p$ -values ( $p < 0.05$ ) are denoted with an asterisk.

|                            | <i>Founder populations</i> |           | <i>Matuwa population</i> |                  |           |           |                  |     |
|----------------------------|----------------------------|-----------|--------------------------|------------------|-----------|-----------|------------------|-----|
|                            | BWI                        | DRY       | BWI                      | $F_1 \times BWI$ | $F_1$     | $F_2$     | $F_1 \times DRY$ | DRY |
| <i>Founder populations</i> |                            |           |                          |                  |           |           |                  |     |
| BWI                        | -                          |           |                          |                  |           |           |                  |     |
| DRY                        | 2.30E-10*                  | -         |                          |                  |           |           |                  |     |
| <i>Matuwa population</i>   |                            |           |                          |                  |           |           |                  |     |
| BWI                        | 0.0005*                    | 0.1725    | -                        |                  |           |           |                  |     |
| $F_1 \times BWI$           | 0.8863                     | 1.10E-06* | 0.0641                   | -                |           |           |                  |     |
| $F_1$                      | 0.1158                     | 0.001*    | 0.7768                   | 0.8627           | -         |           |                  |     |
| $F_2$                      | 0.709                      | 7.60E-14* | 7.70E-08*                | 0.0547           | 0.0003*   | -         |                  |     |
| $F_1 \times DRY$           | 8.30E-14*                  | 0.7768    | 0.001*                   | 4.80E-11*        | 4.10E-07* | 9.10E-14* | -                |     |
| DRY                        | 1.40E-06*                  | 0.8627    | 0.9413                   | 0.001*           | 0.1158    | 3.20E-11* | 0.0641           | -   |
