# Supplementary material for: Population Genomics of Bettongia lesueur: Admixing Increases Genetic Diversity with no Evidence of Outbreeding Depression
Source: MDPI journal article supplement (doi:10.3390/genes10110851), 2019-10-28
Supplement: s1 [file s1]

**Table S5.** Upper and lower 95% confidence intervals calculated by bootstrapping for  $F_{IS}$  values for Barrow Island (BWI), Dryandra (DRY) and the Matuwa translocated population of *Bettongia lesueur* between 2011 and 2018.

|      | $F_{IS}$ | Lower CI | Upper CI |
|------|----------|----------|----------|
| BWI  | 0.050    | 0.045    | 0.056    |
| DRY  | 0.012    | 0.006    | 0.018    |
| 2011 | 0.250    | 0.244    | 0.256    |
| 2012 | 0.072    | 0.068    | 0.077    |
| 2013 | 0.121    | 0.117    | 0.125    |
| 2014 | 0.049    | 0.045    | 0.053    |
| 2015 | 0.019    | 0.014    | 0.024    |
| 2016 | 0.037    | 0.032    | 0.042    |
| 2017 | 0.040    | 0.034    | 0.045    |
| 2018 | 0.042    | 0.037    | 0.047    |
