# Supplementary material for: Population Genomics of Bettongia lesueur: Admixing Increases Genetic Diversity with no Evidence of Outbreeding Depression
Source: MDPI journal article supplement (doi:10.3390/genes10110851), 2019-10-28
Supplement: s1 [file s1]

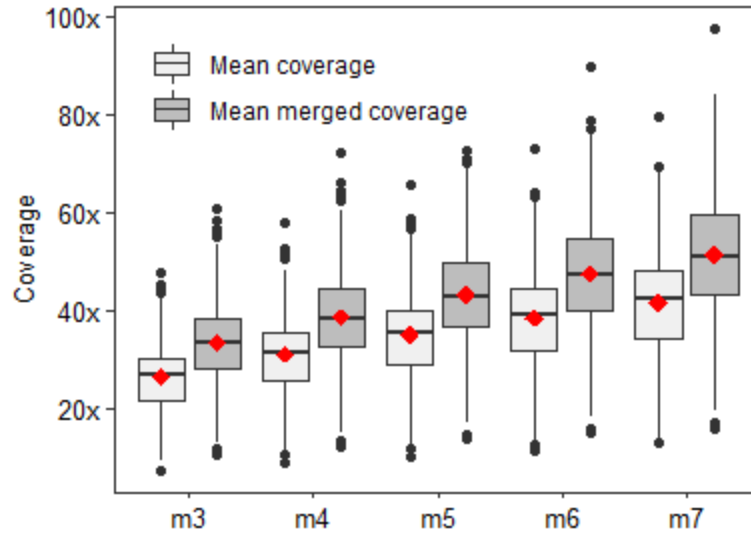

**Figure S1.** Coverage for all individuals of *Bettongia lesueur* sampled (including founder individuals) represented as a box plot, where mean coverage (white) is the average coverage for primary reads and mean merged coverage (grey) is the coverage after merging alleles. Average is indicated by a red diamond. Middle horizontal line reflects the median, the boxes are bound by the 25th and 75th quartiles and the vertical lines show the minimum and maximum range of values.
