# Supplementary material for: Population Genomics of Bettongia lesueur: Admixing Increases Genetic Diversity with no Evidence of Outbreeding Depression
Source: MDPI journal article supplement (doi:10.3390/genes10110851), 2019-10-28
Supplement: s1 [file s1]

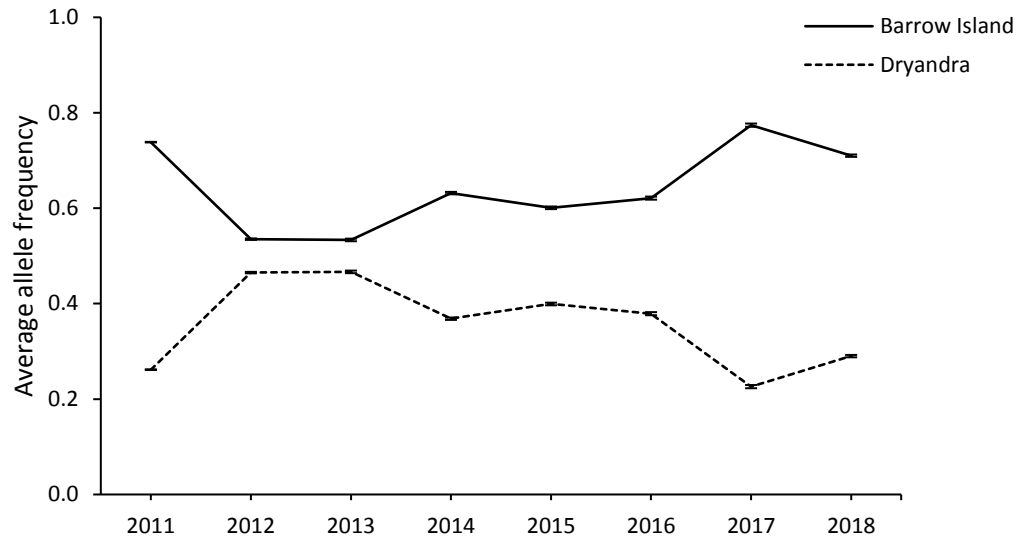

**Figure S3.** Average allele frequency  $\pm$  standard error in the admixed *Bettongia lesueur* population at Matuwa over time for 954 loci with fixed alleles for either Barrow Island founders (BWI) or Dryandra (DRY) founders.
