# Supplementary material for: Population Genomics of Bettongia lesueur: Admixing Increases Genetic Diversity with no Evidence of Outbreeding Depression
Source: MDPI journal article supplement (doi:10.3390/genes10110851), 2019-10-28
Supplement: s1 [file s1]

**Figure S8.** Friedman’s ANOVA p-values for male and female apparent survival estimates of *Bettongia lesueur* from founder populations; Barrow Island and Dryandra and each hybrid class of the translocated population; pure-bred Barrow Island (BWI), pure-bred Dryandra (DRY), backcross to Barrow Island (F1×BWI), F1 hybrid (F1), F2 hybrid (F2), backcross to Dryandra (F1×DRY) and pure-bred Dryandra (DRY). Significant p-values ( $p<0.05$ ) are denoted with an asterisk.

|                           |   | <i>Founder populations</i> |            |            |            | <i>Matuwa population</i> |            |            |            |            |            |            |            |            |            |       |   |
|---------------------------|---|----------------------------|------------|------------|------------|--------------------------|------------|------------|------------|------------|------------|------------|------------|------------|------------|-------|---|
|                           |   | BWI                        |            | DRY        |            | BWI                      |            | F1×BWI     |            | F1         |            | F2         |            | F1×DRY     |            | DRY   |   |
|                           |   | F                          | M          | F          | M          | F                        | M          | F          | M          | F          | M          | F          | M          | F          | M          | F     | M |
| <i>Founder population</i> |   |                            |            |            |            |                          |            |            |            |            |            |            |            |            |            |       |   |
| BWI                       | F | -                          |            |            |            |                          |            |            |            |            |            |            |            |            |            |       |   |
|                           | M | 0.697                      | -          |            |            |                          |            |            |            |            |            |            |            |            |            |       |   |
| DRY                       | F | 0.070                      | 0.999      | -          |            |                          |            |            |            |            |            |            |            |            |            |       |   |
|                           | M | 0.006*                     | 0.906      | 1.000      | -          |                          |            |            |            |            |            |            |            |            |            |       |   |
| <i>Matuwa population</i>  |   |                            |            |            |            |                          |            |            |            |            |            |            |            |            |            |       |   |
| BWI                       | F | 1.000                      | 0.168      | 0.004*     | 1.600E-04* | -                        |            |            |            |            |            |            |            |            |            |       |   |
|                           | M | 1.000                      | 0.977      | 0.358      | 0.059      | 0.987                    | -          |            |            |            |            |            |            |            |            |       |   |
| F1<br>×BWI                | F | 0.591                      | 0.001*     | 1.800E-06* | 2.200E-08* | 0.977                    | 0.168      | -          |            |            |            |            |            |            |            |       |   |
|                           | M | 0.963                      | 0.012*     | 8.800E-05* | 1.800E-06* | 1.000                    | 0.634      | 1.000      | -          |            |            |            |            |            |            |       |   |
| F1                        | F | 8.300E-10*                 | 2.100E-13* | 1.500E-13* | 1.600E-13* | 1.600E-07*               | 6.800E-12* | 0.001*     | 2.000E-05* | -          |            |            |            |            |            |       |   |
|                           | M | 9.500E-08*                 | 1.800E-13* | 1.400E-13* | 1.500E-13* | 1.100E-05*               | 1.200E-09* | 0.014*     | 0.001*     | 1.000      | -          |            |            |            |            |       |   |
| F2                        | F | 3.100E-04*                 | 6.800E-10* | 3.600E-13* | 1.300E-13* | 0.010*                   | 1.100E-05* | 0.591      | 0.145      | 0.717      | 0.987      | -          |            |            |            |       |   |
|                           | M | 0.091                      | 6.600E-06* | 7.100E-09* | 4.700E-11* | 0.525                    | 9.890E-03* | 1.000      | 0.969      | 0.025      | 0.207      | 0.987      | -          |            |            |       |   |
| F1<br>×DRY                | F | 4.800E-06*                 | 1.900E-12* | 1.200E-13* | 1.300E-13* | 3.100E-04*               | 9.500E-08* | 0.115      | 0.011*     | 0.993      | 1.000      | 1.000      | 0.655      | -          |            |       |   |
|                           | M | 0.006*                     | 5.500E-08* | 2.500E-11* | 3.000E-13* | 0.091                    | 3.100E-04* | 0.951      | 0.547      | 0.252      | 0.756      | 1.000      | 1.000      | 0.987      | -          |       |   |
| DRY                       | F | 0.999                      | 1.000      | 0.717      | 0.221      | 0.856                    | 1.000      | 0.041*     | 0.285      | 3.600E-13* | 3.800E-11* | 6.600E-07* | 0.001*     | 4.000E-09* | 2.700E-05* | -     |   |
|                           | M | 0.398                      | 1.000      | 1.000      | 0.989      | 0.054                    | 0.856      | 8.800E-05* | 0.002*     | 1.400E-13* | 1.300E-13* | 3.800E-11* | 6.600E-07* | 2.700E-13* | 4.000E-09* | 0.987 | - |
