# Supplementary material for: Population Genomics of Bettongia lesueur: Admixing Increases Genetic Diversity with no Evidence of Outbreeding Depression
Source: MDPI journal article supplement (doi:10.3390/genes10110851), 2019-10-28
Supplement: s1 [file s1]

**Table S6.** Estimated membership to a particular cluster assuming two admixed populations for each individual from the founder populations (BWI and DRY) and the translocated population from 2010 to 2018 estimated using fastSTRUCTURE and gg hybrid. Hybrid class determined using NEWHYBRIDS is also shown for the translocated population: pure-bred Barrow Island (BWI), pure-bred Dryandra (DRY), backcross to Barrow Island (F<sub>1</sub>×BWI), F<sub>1</sub> hybrid (F<sub>1</sub>), F<sub>2</sub> hybrid (F<sub>2</sub>), backcross to Dryandra (F<sub>1</sub>×DRY) and pure-bred Dryandra (DRY).

| Population         | Individual ID | fastSTRUCTURE |         | gg hybrid |             | Hybrid Class |
|--------------------|---------------|---------------|---------|-----------|-------------|--------------|
|                    |               | BWI           | DRY     | BWI       | DRY         |              |
| Founder population |               |               |         |           |             |              |
| BWI                | D5991         | 0.99920       | 0.00080 | 0.99994   | 0.00006     | BWI founder  |
|                    | D5992         | 0.99930       | 0.00070 | 0.99995   | 0.00005     | BWI founder  |
|                    | D5993         | 0.99900       | 0.00100 | 0.99994   | 0.00006     | BWI founder  |
|                    | D5996         | 0.99920       | 0.00080 | 0.99995   | 0.00005     | BWI founder  |
|                    | D5997         | 0.99710       | 0.00290 | 0.99285   | 0.00715     | BWI founder  |
|                    | D5998         | 0.99920       | 0.00080 | 0.99995   | 0.00005     | BWI founder  |
|                    | D6000         | 0.99920       | 0.00080 | 0.99995   | 0.00005     | BWI founder  |
|                    | D6001         | 0.99930       | 0.00070 | 0.99995   | 0.00005     | BWI founder  |
|                    | D6003         | 0.99930       | 0.00070 | 0.99995   | 0.00005     | BWI founder  |
|                    | D6004         | 0.99880       | 0.00120 | 0.99992   | 0.00008     | BWI founder  |
|                    | D6005         | 0.99900       | 0.00100 | 0.99994   | 0.00006     | BWI founder  |
|                    | D6006         | 0.99930       | 0.00070 | 0.99995   | 0.00005     | BWI founder  |
|                    | D6007         | 0.99930       | 0.00070 | 0.99995   | 0.00005     | BWI founder  |
|                    | D6010         | 0.99940       | 0.00060 | 0.99995   | 0.00005     | BWI founder  |
|                    | D6011         | 0.99850       | 0.00150 | 0.99801   | 0.00200     | BWI founder  |
|                    | D6012         | 0.99930       | 0.00070 | 0.99995   | 0.00005     | BWI founder  |
|                    | D6015         | 0.99930       | 0.00070 | 0.99995   | 0.00005     | BWI founder  |
|                    | D6016         | 0.99920       | 0.00080 | 0.99995   | 0.00005     | BWI founder  |
|                    | D6017         | 0.99930       | 0.00070 | 0.99996   | 0.00005     | BWI founder  |
|                    | D6018         | 0.99920       | 0.00080 | 0.99995   | 0.00005     | BWI founder  |
|                    | D6019         | 0.99890       | 0.00110 | 0.99995   | 0.00005     | BWI founder  |
| D6020              | 0.99880       | 0.00120       | 0.99990 | 0.00010   | BWI founder |              |
| Dryandra           | D6021         | 0.00000       | 1.00000 | 0.00005   | 0.99995     | DRY founder  |
|                    | D6022         | 0.00000       | 1.00000 | 0.00005   | 0.99995     | DRY founder  |
|                    | D6023         | 0.00000       | 1.00000 | 0.00004   | 0.99996     | DRY founder  |
|                    | D6024         | 0.00000       | 1.00000 | 0.00005   | 0.99996     | DRY founder  |
|                    | D6026         | 0.00000       | 1.00000 | 0.00004   | 0.99996     | DRY founder  |
|                    | D6027         | 0.00000       | 1.00000 | 0.00005   | 0.99996     | DRY founder  |
|                    | D6028         | 0.00000       | 1.00000 | 0.00005   | 0.99995     | DRY founder  |
|                    | D6029         | 0.00000       | 1.00000 | 0.00005   | 0.99996     | DRY founder  |
|                    | D6031         | 0.00000       | 1.00000 | 0.00005   | 0.99996     | DRY founder  |
|                    | D6032         | 0.00000       | 1.00000 | 0.00005   | 0.99996     | DRY founder  |
|                    | D6033         | 0.00000       | 1.00000 | 0.00005   | 0.99996     | DRY founder  |

|                                |       |         |         |         |         |             |
|--------------------------------|-------|---------|---------|---------|---------|-------------|
|                                | D6036 | 0.00000 | 1.00000 | 0.00005 | 0.99996 | DRY founder |
|                                | D6038 | 0.00000 | 1.00000 | 0.00004 | 0.99996 | DRY founder |
|                                | D6039 | 0.00000 | 1.00000 | 0.00005 | 0.99996 | DRY founder |
|                                | D6040 | 0.00000 | 1.00000 | 0.00005 | 0.99995 | DRY founder |
|                                | D6041 | 0.00000 | 1.00000 | 0.00005 | 0.99995 | DRY founder |
|                                | D6042 | 0.00000 | 1.00000 | 0.00005 | 0.99995 | DRY founder |
|                                | D6043 | 0.00000 | 1.00000 | 0.00005 | 0.99995 | DRY founder |
|                                | D6044 | 0.00000 | 1.00000 | 0.00005 | 0.99996 | DRY founder |
|                                | D6047 | 0.00000 | 1.00000 | 0.00005 | 0.99996 | DRY founder |
|                                | D6048 | 0.00000 | 1.00000 | 0.00005 | 0.99996 | DRY founder |
|                                | D6050 | 0.00000 | 1.00000 | 0.00005 | 0.99995 | DRY founder |
|                                | D6063 | 0.00000 | 1.00000 | 0.00005 | 0.99996 | DRY founder |
|                                | D6064 | 0.00000 | 1.00000 | 0.00005 | 0.99995 | DRY founder |
| <b>Translocated population</b> |       |         |         |         |         |             |
| <b>2010</b>                    | D5940 | 0.99760 | 0.00240 | 0.99995 | 0.00005 | BWI         |
|                                | D5941 | 0.99500 | 0.00500 | 0.99995 | 0.00005 | BWI         |
|                                | D5942 | 0.99600 | 0.00400 | 0.99995 | 0.00005 | BWI         |
|                                | D5943 | 0.99860 | 0.00140 | 0.99995 | 0.00005 | BWI         |
| <b>2011</b>                    | D5936 | 0.00000 | 1.00000 | 0.00004 | 0.99996 | DRY         |
|                                | D5937 | 0.99940 | 0.00060 | 0.99995 | 0.00005 | BWI         |
|                                | D5938 | 0.49390 | 0.50610 | 0.50575 | 0.49426 | F1          |
|                                | D5945 | 0.99400 | 0.00600 | 0.99995 | 0.00005 | BWI         |
|                                | D5946 | 0.99540 | 0.00460 | 0.99995 | 0.00005 | BWI         |
|                                | D5947 | 0.99660 | 0.00340 | 0.99995 | 0.00005 | BWI         |
|                                | D5948 | 0.99640 | 0.00360 | 0.99995 | 0.00005 | BWI         |
|                                | D5949 | 0.00000 | 1.00000 | 0.00005 | 0.99996 | DRY         |
|                                | D5950 | 0.48410 | 0.51590 | 0.49598 | 0.50402 | F1          |
|                                | D5951 | 0.99730 | 0.00270 | 0.99995 | 0.00005 | BWI         |
|                                | D5952 | 0.99940 | 0.00060 | 0.99995 | 0.00005 | BWI         |
|                                | D5953 | 0.99760 | 0.00240 | 0.99995 | 0.00005 | BWI         |
|                                | D5954 | 0.99940 | 0.00060 | 0.99995 | 0.00005 | BWI         |
|                                | D5955 | 0.99760 | 0.00240 | 0.99995 | 0.00005 | BWI         |
|                                | D5956 | 0.00250 | 0.99750 | 0.00005 | 0.99996 | DRY         |
| <b>2012</b>                    | D5934 | 0.49040 | 0.50960 | 0.50241 | 0.49759 | F1          |
|                                | D5935 | 0.99690 | 0.00310 | 0.99995 | 0.00005 | BWI         |
|                                | D5957 | 0.23910 | 0.76090 | 0.24104 | 0.75896 | F1×DRY      |
|                                | D5958 | 0.99820 | 0.00180 | 0.99995 | 0.00005 | BWI         |
|                                | D5959 | 0.99910 | 0.00090 | 0.99995 | 0.00005 | BWI         |
|                                | D5960 | 0.30100 | 0.69900 | 0.30752 | 0.69248 | F1×DRY      |
|                                | D5961 | 0.00000 | 1.00000 | 0.00005 | 0.99996 | DRY         |
|                                | D5962 | 0.99740 | 0.00260 | 0.99995 | 0.00005 | BWI         |
|                                | D5963 | 0.48280 | 0.51720 | 0.49385 | 0.50615 | F1          |
|                                | D5964 | 0.99840 | 0.00160 | 0.99995 | 0.00005 | BWI         |

|      |       |         |         |         |         |        |
|------|-------|---------|---------|---------|---------|--------|
| 2013 | D5965 | 0.49990 | 0.50010 | 0.50897 | 0.49103 | F1     |
|      | D5966 | 0.00200 | 0.99800 | 0.00005 | 0.99995 | DRY    |
|      | D5967 | 0.48150 | 0.51850 | 0.49222 | 0.50778 | F1     |
|      | D5969 | 0.69440 | 0.30560 | 0.71439 | 0.28561 | F1×BWI |
|      | D5970 | 0.49450 | 0.50550 | 0.50550 | 0.49450 | F1     |
|      | D5971 | 0.49030 | 0.50970 | 0.49872 | 0.50128 | F1     |
|      | D5972 | 0.48150 | 0.51850 | 0.48991 | 0.51009 | F1     |
|      | D5973 | 0.00000 | 1.00000 | 0.00004 | 0.99996 | DRY    |
|      | D5974 | 0.19160 | 0.80840 | 0.18840 | 0.81160 | F1×DRY |
|      | D5877 | 0.99630 | 0.00370 | 0.99995 | 0.00005 | BWI    |
|      | D5878 | 0.99870 | 0.00130 | 0.99995 | 0.00005 | BWI    |
|      | D5914 | 0.55360 | 0.44640 | 0.57142 | 0.42858 | F2     |
|      | D5915 | 0.49650 | 0.50350 | 0.50562 | 0.49438 | F1     |
|      | D5916 | 0.00310 | 0.99690 | 0.00005 | 0.99995 | DRY    |
|      | D5917 | 0.99820 | 0.00180 | 0.99995 | 0.00005 | BWI    |
|      | D5918 | 0.47940 | 0.52060 | 0.48982 | 0.51018 | F1     |
|      | D5919 | 0.23830 | 0.76170 | 0.23746 | 0.76255 | F1×DRY |
|      | D5920 | 0.48180 | 0.51820 | 0.49065 | 0.50935 | F1     |
|      | D5922 | 0.69310 | 0.30690 | 0.70878 | 0.29122 | F1×BWI |
|      | D5925 | 0.45190 | 0.54810 | 0.46310 | 0.53690 | F2     |
|      | D5927 | 0.26570 | 0.73430 | 0.26646 | 0.73354 | F1×DRY |
|      | D5929 | 0.32750 | 0.67250 | 0.33097 | 0.66903 | F1×DRY |
|      | D5930 | 0.69660 | 0.30340 | 0.71251 | 0.28749 | F1×BWI |
|      | D5931 | 0.64770 | 0.35230 | 0.66128 | 0.33872 | F1×BWI |
|      | D5932 | 0.68980 | 0.31020 | 0.70582 | 0.29418 | F1×BWI |
|      | D5975 | 0.00000 | 1.00000 | 0.00005 | 0.99995 | DRY    |
|      | D5976 | 0.00010 | 0.99990 | 0.00005 | 0.99996 | DRY    |
|      | D5977 | 0.99710 | 0.00290 | 0.99995 | 0.00005 | BWI    |
|      | D5978 | 0.00210 | 0.99790 | 0.00005 | 0.99995 | DRY    |
|      | D5979 | 0.99720 | 0.00280 | 0.99995 | 0.00005 | BWI    |
|      | D5980 | 0.47980 | 0.52020 | 0.49041 | 0.50959 | F1     |
|      | D5981 | 0.00090 | 0.99910 | 0.00005 | 0.99996 | DRY    |
|      | D5984 | 0.50050 | 0.49950 | 0.50766 | 0.49235 | F1     |
|      | D5985 | 0.60410 | 0.39590 | 0.61974 | 0.38026 | F2     |
|      | D5987 | 0.00000 | 1.00000 | 0.00005 | 0.99996 | DRY    |
|      | D5988 | 0.00000 | 1.00000 | 0.00005 | 0.99996 | DRY    |
|      | D5989 | 0.74390 | 0.25610 | 0.76276 | 0.23724 | F1×BWI |
|      | D5990 | 0.14920 | 0.85080 | 0.14449 | 0.85551 | F1×DRY |
|      | D6051 | 0.42380 | 0.57620 | 0.42922 | 0.57079 | F2     |
|      | D6052 | 0.99800 | 0.00200 | 0.99995 | 0.00005 | BWI    |
|      | D6053 | 0.99610 | 0.00390 | 0.99995 | 0.00005 | BWI    |
|      | D6054 | 0.48700 | 0.51300 | 0.50107 | 0.49893 | F1     |
|      | D6055 | 0.50010 | 0.49990 | 0.50796 | 0.49204 | F1     |

|      |       |         |         |         |         |        |
|------|-------|---------|---------|---------|---------|--------|
| 2014 | D6056 | 0.99830 | 0.00170 | 0.99995 | 0.00005 | F1     |
|      | D6057 | 0.99510 | 0.00490 | 0.99995 | 0.00005 | F1     |
|      | D6058 | 0.24480 | 0.75520 | 0.24431 | 0.75569 | F1×DRY |
|      | D5809 | 0.70200 | 0.29800 | 0.71986 | 0.28015 | F1×BWI |
|      | D5810 | 0.91440 | 0.08560 | 0.93211 | 0.06790 | BWI    |
|      | D5811 | 0.99770 | 0.00230 | 0.99995 | 0.00005 | BWI    |
|      | D5812 | 0.00040 | 0.99960 | 0.00005 | 0.99995 | DRY    |
|      | D5813 | 0.68690 | 0.31310 | 0.70384 | 0.29616 | F1×BWI |
|      | D5814 | 0.31940 | 0.68060 | 0.32032 | 0.67968 | F1×DRY |
|      | D5815 | 0.25530 | 0.74470 | 0.25870 | 0.74130 | F1×DRY |
|      | D5816 | 0.80390 | 0.19610 | 0.82173 | 0.17828 | F1×BWI |
|      | D5817 | 0.61370 | 0.38630 | 0.62843 | 0.37157 | F2     |
|      | D5818 | 0.79000 | 0.21000 | 0.81003 | 0.18997 | F1×BWI |
|      | D5819 | 0.99830 | 0.00170 | 0.99995 | 0.00005 | BWI    |
|      | D5820 | 0.49470 | 0.50530 | 0.50649 | 0.49352 | F1     |
|      | D5821 | 0.53390 | 0.46610 | 0.54619 | 0.45381 | F2     |
|      | D5822 | 0.99370 | 0.00630 | 0.99995 | 0.00005 | BWI    |
|      | D5855 | 0.44370 | 0.55630 | 0.45392 | 0.54608 | F2     |
|      | D5856 | 0.99560 | 0.00440 | 0.99995 | 0.00005 | BWI    |
|      | D5857 | 0.18700 | 0.81300 | 0.18276 | 0.81724 | F1×DRY |
|      | D5859 | 0.40770 | 0.59230 | 0.41513 | 0.58487 | F1     |
|      | D5860 | 0.49030 | 0.50970 | 0.50166 | 0.49834 | F1     |
|      | D5861 | 0.75840 | 0.24160 | 0.77562 | 0.22438 | F1×BWI |
|      | D5862 | 0.28850 | 0.71150 | 0.28796 | 0.71204 | F1×DRY |
|      | D5863 | 0.99670 | 0.00330 | 0.99995 | 0.00005 | BWI    |
|      | D5865 | 0.71750 | 0.28250 | 0.73373 | 0.26627 | F1×BWI |
|      | D5866 | 0.75920 | 0.24080 | 0.77937 | 0.22063 | F1×BWI |
|      | D5867 | 0.75550 | 0.24450 | 0.77413 | 0.22587 | F1×BWI |
|      | D5868 | 0.49370 | 0.50630 | 0.50067 | 0.49933 | F1     |
|      | D5869 | 0.49770 | 0.50230 | 0.50354 | 0.49646 | F1     |
|      | D5871 | 0.45660 | 0.54340 | 0.46665 | 0.53335 | F2     |
|      | D5872 | 0.99600 | 0.00400 | 0.99995 | 0.00005 | BWI    |
|      | D5874 | 0.41110 | 0.58890 | 0.41887 | 0.58113 | F1     |
|      | D5875 | 0.73170 | 0.26830 | 0.74741 | 0.25259 | F1×BWI |
|      | D5876 | 0.34120 | 0.65880 | 0.34374 | 0.65626 | F2     |
| 2015 | D5913 | 0.29890 | 0.70110 | 0.30380 | 0.69620 | F1×DRY |
|      | D5823 | 0.47110 | 0.52890 | 0.48057 | 0.51943 | F2     |
|      | D5824 | 0.78540 | 0.21460 | 0.80419 | 0.19581 | F1×BWI |
|      | D5825 | 0.99810 | 0.00190 | 0.99995 | 0.00005 | BWI    |
|      | D5826 | 0.22980 | 0.77020 | 0.23075 | 0.76926 | F1×DRY |
|      | D5827 | 0.84420 | 0.15580 | 0.86005 | 0.13996 | F1×BWI |
|      | D5828 | 0.17290 | 0.82710 | 0.16924 | 0.83076 | F1×DRY |
|      | D5829 | 0.49440 | 0.50560 | 0.50425 | 0.49575 | F1     |

|      |       |         |         |         |         |        |
|------|-------|---------|---------|---------|---------|--------|
| 2016 | D5850 | 0.61660 | 0.38340 | 0.63055 | 0.36945 | F1×BWI |
|      | D5851 | 0.31250 | 0.68750 | 0.31773 | 0.68227 | F1×DRY |
|      | D5852 | 0.80670 | 0.19330 | 0.82549 | 0.17451 | F1×BWI |
|      | D5854 | 0.50020 | 0.49980 | 0.51096 | 0.48904 | F1     |
|      | D5912 | 0.59790 | 0.40210 | 0.60957 | 0.39043 | F2     |
|      | D6059 | 0.49360 | 0.50640 | 0.50488 | 0.49512 | F1     |
|      | D6060 | 0.31870 | 0.68130 | 0.31991 | 0.68009 | F1×DRY |
|      | D6061 | 0.99820 | 0.00180 | 0.99995 | 0.00005 | BWI    |
|      | D6062 | 0.66110 | 0.33890 | 0.67631 | 0.32369 | F1×BWI |
|      | D5830 | 0.37750 | 0.62250 | 0.38391 | 0.61609 | F2     |
|      | D5831 | 0.66920 | 0.33080 | 0.68465 | 0.31535 | F1×BWI |
|      | D5832 | 0.62950 | 0.37050 | 0.64197 | 0.35804 | F1×BWI |
|      | D5843 | 0.53670 | 0.46330 | 0.55006 | 0.44994 | F2     |
|      | D5844 | 0.99700 | 0.00300 | 0.99995 | 0.00005 | BWI    |
|      | D5845 | 0.69280 | 0.30720 | 0.70863 | 0.29138 | F1×BWI |
|      | D5846 | 0.31670 | 0.68330 | 0.32089 | 0.67911 | F2     |
|      | D5847 | 0.99830 | 0.00170 | 0.99995 | 0.00005 | BWI    |
|      | D5848 | 0.77930 | 0.22070 | 0.79911 | 0.20090 | F1×BWI |
|      | D5849 | 0.48800 | 0.51200 | 0.49998 | 0.50002 | F1     |
|      | D5883 | 0.57060 | 0.42940 | 0.58283 | 0.41717 | F2     |
| 2017 | D5884 | 0.53430 | 0.46570 | 0.54665 | 0.45335 | F2     |
|      | D5888 | 0.32140 | 0.67860 | 0.32604 | 0.67396 | F1×DRY |
|      | D5889 | 0.53420 | 0.46580 | 0.54331 | 0.45669 | F2     |
|      | D5891 | 0.56800 | 0.43200 | 0.57743 | 0.42257 | F2     |
|      | D5833 | 0.75030 | 0.24970 | 0.76763 | 0.23237 | F1×BWI |
|      | D5834 | 0.99860 | 0.00140 | 0.99995 | 0.00005 | BWI    |
|      | D5835 | 0.84140 | 0.15860 | 0.85980 | 0.14020 | F1×BWI |
|      | D5836 | 0.99780 | 0.00220 | 0.99995 | 0.00005 | BWI    |
|      | D5837 | 0.56730 | 0.43270 | 0.57820 | 0.42181 | F2     |
|      | D5838 | 0.99930 | 0.00070 | 0.99995 | 0.00005 | BWI    |
|      | D5839 | 0.90360 | 0.09640 | 0.91939 | 0.08061 | F1×BWI |
|      | D5840 | 0.75840 | 0.24160 | 0.76818 | 0.23182 | F1×BWI |
|      | D5842 | 0.74900 | 0.25100 | 0.76817 | 0.23184 | F1×BWI |
|      | D5882 | 0.49770 | 0.50230 | 0.50990 | 0.49011 | F1     |
|      | D5886 | 0.66910 | 0.33090 | 0.68271 | 0.31729 | F1×BWI |
|      | D5887 | 0.76940 | 0.23060 | 0.78296 | 0.21704 | F1×BWI |
|      | D5890 | 0.64120 | 0.35880 | 0.65773 | 0.34227 | F1×BWI |
|      | D5892 | 0.99690 | 0.00310 | 0.99995 | 0.00005 | BWI    |
|      | D5909 | 0.24350 | 0.75650 | 0.24098 | 0.75902 | F1×DRY |
| 2018 | D5881 | 0.75370 | 0.24630 | 0.76723 | 0.23277 | F1×BWI |
|      | D5893 | 0.60580 | 0.39420 | 0.61709 | 0.38291 | BWI    |
|      | D5895 | 0.39790 | 0.60210 | 0.40686 | 0.59314 | F2     |
|      | D5896 | 0.41770 | 0.58230 | 0.42415 | 0.57585 | F2     |

|       |         |         |         |         |        |
|-------|---------|---------|---------|---------|--------|
| D5897 | 0.99680 | 0.00320 | 0.99995 | 0.00005 | BWI    |
| D5898 | 0.70410 | 0.29590 | 0.72210 | 0.27790 | F1×BWI |
| D5899 | 0.40860 | 0.59140 | 0.41727 | 0.58273 | F2     |
| D5900 | 0.58920 | 0.41080 | 0.59932 | 0.40068 | F2     |
| D5901 | 0.82460 | 0.17540 | 0.84250 | 0.15750 | F1×BWI |
| D5902 | 0.78300 | 0.21700 | 0.80223 | 0.19777 | F1×BWI |
| D5904 | 0.49710 | 0.50290 | 0.50525 | 0.49475 | F1     |
| D5905 | 0.83270 | 0.16730 | 0.85455 | 0.14545 | F1×BWI |
| D5906 | 0.99870 | 0.00130 | 0.99995 | 0.00005 | BWI    |
| D5907 | 0.72770 | 0.27230 | 0.74385 | 0.25615 | F1×BWI |
| D5908 | 0.88700 | 0.11300 | 0.90183 | 0.09817 | F1×BWI |
