# Supplementary material for: Population Genomics of Bettongia lesueur: Admixing Increases Genetic Diversity with no Evidence of Outbreeding Depression
Source: Genes (Basel). 2019 Oct 28;10(11):851. doi: 10.3390/genes10110851 (PMC6896034; doi:10.3390/genes10110851)
Supplement: Supplementary file 1 [file genes-10-00851-s001.zip]

Archive with 12 entries (12 files):
- Figure S1. Coverage for all individuals of Bettongia lesueur sampled.pdf
- Figure S2. Plots of iterating values for m and M in STACKS pipeline.pdf
- Figure S3. Average allele frequency.pdf
- Table S2. AIC values for reduced models tested in openCR.pdf
- Table S3. Average error rates of replicated samples for iterating STACKS parameters.pdf
- Table S4. Multi-locus heterozygosity.pdf
- Table S8. Friedman's ANOVA p-values for apparent survival.pdf
- Table S9. Friedman's ANOVA p-values for per capita recruitment rate.pdf
- Table S1. Number of Bettongia lesueur samples from Matuwa selected for genetic analysis.pdf
- Table S5. Upper and lower 95% confidence intervals calculated by bootstrapping for Fis values.pdf
- Table S6. Estimated membership to a particular cluster assuming two admixed populations.pdf
- Table S7. Apparent survival and recruitment rate estimates and 95% confidence intervals.pdf
